# Supplementary material for: Flavin-Dependent Monooxygenases as a Detoxification Mechanism in Insects: New Insights from the Arctiids (Lepidoptera)
Source: PubMed Central journal article supplement (PMC2862711; doi:10.1371/journal.pone.0010435), 2010-05-03
Supplement: pone.0010435.s001.pdf [file pone.0010435.s001.pdf]

```

      10      20      30      40      50      60      70      80      90     100
...|...|...|...|...|...|...|...|...|...|...|...|...|...|...|...|
BmFM02LR      GGTWRYDPRVGTDENGPLHTSMYKHLHTNLPKPTMELRGGFPLPDGI-PSFSPSWKIYDYLDKYAKHFDIEKYIQFRHNVTLV---RREQNVVWVTHEH
HaFM02LR      GGTWRYDTHVGTDENGQPLHTSMYKYLRTNLPKAPMEMRGGFPLPDYL-PSYPTGRDFYHYLIEECVDRDLIKKYIKFLHAVVSV---RRINEVWVKVYEH
BmFM01LR      GGTWRFDPHVGTDEEDGLPFTSSMYKNLRTNTPRQTMETMEYDFPFPEG-TPSYPSATCFLDYKLSFVKHFDDLSSHQRLSLVTSV---KWAGNHWNLTYYTK
HaFM01LR      GGTWRFDPHVGTDEEDGLPFTSSMYKNLRTNTPRQTMETMEYAGFFPFPEG-TPSYPTGCFYKYLQHFAKHFELMNNIQLQSYVNLV---KWAKDHWEEVYTK
Bicyclus-FM01-PepPart
AcFM01pGEMproof+S      GGTWRYTPRVGTDEYGAFLFTSAYKDLRTNSFYPTMELPDYFPFAGPVSSFLSGPCIYKYLEGYTKQFNLEKYIQFRSLVTNV---EKVGDNWKVITYMK
AvFM01hypLR      GGTWRYTARVGTDEYGAFLFTSAYKDLRTNSFYPTMELPDYFPFAGPVSSFLSGPCIYKYLEGYTKQFNLEKYIQFRSLVTSV---EKVGDNWNVITYMK
dsannioFM0int_3raceLR      GGTWSYTPRVGTDEYGAFLFTSSYKDLRTNSFYQSMELPDYFPFAGPVSSFLSGPCIYKYLEGFTKQFNLEKYIRFRSLVNSV---EKVGDNWNVITYMK
TjFM02pGEMproof+S      GGTWKYTPRVGTDENGAPLFTSAYKNLRTNSFYQTMELPDYFPFQGS-SSYLSGPCIYKYLQGYTKQFNLEKHKIKFQSLVTSV---ERVGDMMNVITYMK
eacreaFM0int_3race_tempLR      GGTWRYDPRVGTDEEDGLPIFSSQYKNLRTNSPYKIMEFHNYSFPEG-TRSFISGGCFYKYMKSFVRHFGMDNIQVQSLITWV---EWTGYSWNLITYMK
AcSN0oSproofLR      -GTWRYDPRVGTDEEDGLPIFSSQYKNLRTNSPYKIMEFHNYSFPEG-TRSFISGGCFYKYMKSFVRHFGMDNIQVQSLVTVW---EWTGDSWNLITYMK
dsannioSN0int_3raceLR      GGTWRYDPRVGTDEEDGLPIFSSQYKYLRTNSPYKIMEFHNYSFPEG-TRSFITGGCFYKYMKSFVRHFGMDNIQVQSLVTVW---EWTGDNWNVITYMK
GgSN0oSproofLR      GGTWRYDPRVGTDEEDGLPIFSSQYKNLRTNSPFKIMEFHNYSFPEG-TRSFVTGGCFYKYMKSFVRHFGMDNIQVQSLVTVW---EWTGDSWNLITYMK
eacreaSN0int+3raceLR      GGTWRYDPRVGTDEEDGLPIYSSNYKNLRTNSPVDLMTYHGIEFQEG-TRSFISGNCFYKYMKSFVRHFGMDNIQVRSVTVW---QRTEDKWNLTITYMK
NoxTyriaproofLR-S      GGTWVYTEKVGYYDFGLPIHSSMYKSLRTNLPKEIMGFDFPVPES-EKSYLPAKEMLSFLQLYADKHQVTDRIQVQSLVTVW---EWTGDSWNLITYMK
BmFM03LR      GGTWVYENYGVYDFGLPIHTSMYKSLRTNLPKEIMGFDFPVPES-EQSYLPAKEMLAFLQLYADKHGVTSEKIKFSHHVQVLPKAGPSGELWDVSYKN
HaFM03bLR      GGTWVYENYGVYDFGLPIHTSMYKSLRTNLPKEIMGFDFPVPES-EKSYLPAKEMLAFLQLYADKHGVTSEKIKFSHHVQVLPKAGPSGELWDVSYKN
Plodia-FM03-PepPart      GGTWVYENYGVYDFGLPIHTSMYKSLRTNLPKEIMGFDFPVPES-EKSYLPAKEMLAFLQLYADKHGVTSEKIKFSHHVQVLPKAGPAGELWDVSYKN
FM03006      GGTWVYENYGVYDFGLPIHTSMYKSLRTNLPKEIMGFDFPVPES-EKSYLPAKEMLAFLQLYADKHGVTSEKIKFSHHVQVLPKAGPAGELWDVSYKN
FM03174      GGTWIFSEEMPKDE-YDEVHSSMYEGLRTNLPKEVMGYPDYSYDDITSEFTSNQVLEFLRSYAEHFKLKAHIKQHEVIRVRPRL---DDWEVYVWD

```

```

      110     120     130     140     150     160     170     180     190     200
...|...|...|...|...|...|...|...|...|...|...|...|...|...|...|...|
BmFM02LR      VITGEVFEENYDYVIVGNGHFSTPNMNPINRGEKLFKGTIIHSHDYRVPDVKDRRVLVVGAGPSGMDIGLDVAECSSKLLSHHS---KVNFRTPFPFH
HaFM02LR      VVTKETFEEDFDYIIIVGNGHFSKPSYPNIPSEDLFTGRIIHSYDYKAPFPTNRRVLVVGAGPSGMDIGLEVADVASALIHSHHS---KINWTTFPFPFH
BmFM01LR      TDTKENVTEICDFIVVANGPYNTPVWPKYDGDITFEFGSMIHSYDYKDRKAYKNRKLIVGAGASGLDLATQLSNVTAQLVHSHHL---VYNEPKFFFDG
HaFM01LR      TDTKEQLTEVCDYFIVVANGYFSSPVPINIDRLEMFKGGKVIHSHDYKDAEERFRNRRLVVGAGASGLDLAMQLSNVTSQFLHSHHL---NYNQPDFSKT
Bicyclus-FM01-PepPart      TDERGDHTVACDFVAVANGQVR-PVVMYPMGLDKYQGSYIHSYDYKAPPEYSDRRVLVVGAGASGLDLAVQLHNITEKLVHSHHL---KYNQPNFSKR
AcFM01pGEMproof+S      TGTQNVSEECGFVVVANGYETAPHVYFAKQEDFKGKMLHSHDYRDSYRGLRVLVVGAGPSAFDLAAHLINVTSMFIHSHHL---DAKIQKVGYN
AvFM01hypLR      TDTKKNVSEECGFVVVANGYETAPHVYFAKQEDFKGKMLHSHDYRDSYRGLRVLVVGAGPSAFDLAAHLINVTSMFIHSHHL---DANIQKAYGN
dsannioFM0int_3raceLR      TDTKKNVSEECGFVVVANGYETAPHVYFAKQEDFKGKMLHSHDYRDSYRGLRVLVVGAGPSAFDLATHLINVTSMFIHSHHL---DASIEKVGYN
TjFM02pGEMproof+S      TDTKENVSEECGFVVVANGYETAPHVYFAKQEDFKGKMLHSHDYRDSYRGLRVLVVGAGPSAFDLATHLINVTSMFIHSHHL---DAKLPVEVYGN
eacreaFM0int_3race_tempLR      TDTKQNVTEECGFVVVANGYETAPHVYFAKQEDFKGKMLHSHDYRDLERYRGLRVLVVGAGPSAFDLAAHLINVTSMFIHSHHL---IADIQEVYGN
AcSN0oSproofLR      TDTRQNYTEECGFVVVANGYETAPKIPHIKQELYKGTMHSHDYKDPEDYRGRVRLVVGAGPSGLDLAVQLSNVTSKLVHSQHIKSFKIYNQPDFPGN
dsannioSN0int_3raceLR      TDTRQNYTEECDFIVVANGYETAPKIPHIKQELYKGTMHSHDYKDPEDYRGRVRLVVGAGPSGLDLAVQLSKVTSKLVHSHHIKSFKIYNQPDFPGN
GgSN0oSproofLR      TDTRKNYTEECDFVVVANGYETAPKIPHIKQELYKGTMHSHDYKDPEDYRGRVRLVVGAGPSGLDLAVQLSNVTSKLVHSHHIKSFKIYNQPDFPGN
eacreaSN0int+3raceLR      TDTRKNYTEECDFVVVANGYETAPKIPHIKQELYKGTMHSHDYKDPEDYRGRVRLVVGAGPSGLDLAVQLSNVTSKLVHSHHIKSFKIYNQPDFPGN
NoxTyriaproofLR-S      LLNGESETREYDYVFCNGHYNTFFIPNIPGLKEFGQDVMHSHDYRVEIFSGKRVLVVGAGPSGMDIALEVTNVAHKVLHSHHL---KEQPRTVFPDN
BmFM03LR      LLNGHSETREYDYVFCNGHYNTFFIPQIPGLKEFGQDVMHSHDYRVEIFSGKRVLVVGAGPSGMDIALELTVSCKVILHSHHL---KDQPRTVFPEN
HaFM03bLR      LLNGHSETREYDYVFCNGHYNTFFIPQIPGLKEFGQDVMHSHDYRVEIFSGKRVLVVGAGPSGMDIALELTVSCKVILHSHHL---KDQPRTVFPEN
Plodia-FM03-PepPart      LRTGVSQTKKEYDYIFVFCNGHYNTFFIPNIPGLKEFYEGDVMHSHDYRVEIFSNKRVLVVGAGPSGMDIALEITNVTDKVLHSHHL---KEQPKTVFPDN
FM03006      LVTNKIEFQYFDKVLVANGHYHTPNYSQIPNMEERFKGQFLHSHDFRSREVEEGKSVLVIAGPSGMDLSNIISRTADRVTIHSHL---TDIGQHSFFEN
FM03174      HSTDTCDPVVYDFVYVFCNGHYTEPDLPEVEGLDLFEGNKMHSYLRYKADKFKDARVLIIGAGPSGMDITNHVRLAAKQVFLSHHL---STTPNTAFMGN

```
