# Supplementary material for: Flavin-Dependent Monooxygenases as a Detoxification Mechanism in Insects: New Insights from the Arctiids (Lepidoptera)
Source: PubMed Central journal article supplement (PMC2862711; doi:10.1371/journal.pone.0010435), 2010-05-03
Supplement: pone.0010435.s002.pdf [file pone.0010435.s002.pdf]

| No. | Primer Sequence                                                                              | Properties          |
|-----|----------------------------------------------------------------------------------------------|---------------------|
| P01 | 5' -dGTC GAC TCG AGA ATT C(T) <sub>17</sub> -3'                                              | oligo(dT) primer    |
| P02 | 5' -dTGY <b>RTN</b> ATH GGN GCN GG-3'                                                        | degenerate primer   |
| P03 | 5' -dCCN <b>AYR</b> AAI GYC ATN GTN GG-3'                                                    | degenerate primer   |
| P04 | 5' -dGTG ACA ATT GGA AGG TGA CAT ATA T-3'                                                    | AcFMO 3'RACE        |
| P05 | 5' -dCTG AAT TTT AGC ATC TAA A-3'                                                            | AcFMO 5'RACE        |
| P06 | 5' -dTTC ATG AGG TGA GCA GCA AGG TCA AA-3'                                                   | AcFMO 5'RACE        |
| P07 | 5' -dTTC TGA CTG TGT AGC ATC TTT CCT TTA-3'                                                  | AcFMO 5'RACE        |
| P08 | 5' -dCCN <b>ACN</b> ATG <b>RCI</b> TTY <b>RTN</b> GG-3'                                      | degenerate primer   |
| P09 | 5' -dGTA AGG TAC ATG GGG CAC AAT-3'                                                          | AvFMO 5'RACE        |
| P10 | 5' -dGAC TTC GGA ATT GAA TAT ATT TTT CCA AAT-3'                                              | AvFMO 5'RACE        |
| P11 | 5' -dGGC AAT TCC ATC GTC GGA TAG AAA GA-3'                                                   | AvFMO 5'RACE        |
| P12 | 5' -dGGN <b>GGN</b> ACI TGG <b>MGN</b> TAY-3'                                                | degenerate primer   |
| P13 | 5' -dAGA CTT TCC TGG CAA CTA CAT AAG TAA-3'                                                  | GgPNO 3'RACE        |
| P14 | 5' -dCAA TTT CGA GGT GAC GTT AGA-3'                                                          | GgPNO 5'RACE        |
| P15 | 5' -dTAA TTC TTG TCC TTC GAT GTG AGG TAT TT-3'                                               | GgPNO 5'RACE        |
| P16 | 5' -dTGA ATG TTG TCC ATC AAT TTA AAA TGT CTT A-3'                                            | GgPNO 5'RACE        |
| P17 | 5' -dGGR <b>AAR</b> <b>TCN</b> GGY TGR TTR <b>WA</b> -3'                                     | degenerate primer   |
| P18 | 5' -dCTC ACA TCA AAG GAC AAG AGT TAT A-3'                                                    | AcPNO 3'RACE        |
| P19 | 5' -dCAC TAA TTT CGA GGT GAC GTT AGA AA-3'                                                   | AcPNO 5'RACE        |
| P20 | 5' -dTGT ATC CCG TCC ATT CAA CCC AAT T-3'                                                    | AcPNO 5'RACE        |
| P21 | 5' -dGCT GAT AAA CGA ACG AGT ACC ATT T-3'                                                    | AcPNO 5'RACE        |
| P22 | 5' -dACA AAA TCA CAT TCT TCC GTA TAA-3'                                                      | AvPNO 5'RACE        |
| P23 | 5' -dGGT TCC AAC TGT CTC CCG TCC ATT CT-3'                                                   | AvPNO 5'RACE        |
| P24 | 5' -dGAA AGA TTT AAT ATA CTT ATA GAA GCA ATC-3'                                              | AvPNO 5'RACE        |
| P25 | 5' -dGGT GGG TGA CAA TTG GAA CGT AAC ATA TA-3'                                               | DsFMO 3'RACE        |
| P26 | 5' -dGGG AGA CAG TTG GAA CCT AAC GTA TAT-3'                                                  | DsPNO 3'RACE        |
| P27 | 5' -dCGT TGT TCG TGG CCA ACG GGG AAT TT-3'                                                   | EaFMO 3'RACE        |
| P28 | 5' -dCGT TCG TCA CTG GAG GTT GCT TCT ATA A-3'                                                | EaPNO 3'RACE        |
| P29 | 5' -dTGR <b>TGN</b> <b>SWR</b> TGD <b>ATR</b> AAC AT-3'                                      | degenerate primer   |
| P30 | 5' -dGTA TAA GAA CTT GAG AAC AAA CTC GTT T-3'                                                | TjFMO 3'RACE        |
| P31 | 5' -dATG GGC CGG CCC CAA CTA-3'                                                              | TjFMO 5'RACE        |
| P32 | 5' -dCGA AGT AAG GTA TAT GTG GTG CGA TGT A-3'                                                | TjFMO 5'RACE        |
| P33 | 5' -dTCT CCC ACC CGC TCA ACA CCA GTT A-3'                                                    | TjFMO 5'RACE        |
| P34 | 5' -dTAT <u>ACA TAT GCA</u> ATC TGA CCA TGC GTC TCG AGC AT-3'                                | GgPNO expr. constr. |
| P35 | 5' -dTAT <u>AGG ATC CCT</u> AAT GAT GAT GAT GAT GAT CGT CAA AAG<br>GAC ATA TTT CCT TCC TT-3' | GgPNO expr. constr. |
| P36 | 5' -dTAT ATA GGT CTC CTC GAG AAA AGA AGT TCA GCG TCT CGA GTA<br>TGC ATT ATT-3'               | TjSNO RT-PCR        |
| P37 | 5' -dTAT AGA TCT CTA ATG GTG ATG GTG ATG GTG ATC GTC ATA GGG<br>ACA TAC TTC TTC-3'           | TjSNO RT-PCR        |
| P38 | 5' -dTAT ACA TAT GGG TGA TAC GTT CCC GCA AGA AAC AA -3'                                      | TjFMO RT-PCR        |
| P39 | 5' -dTAT ACT CGA GTA CTT GTA CAT CTA AAG GAC ATA CTT TTT TCT-3'                              | TjFMO RT-PCR        |
