# Supplementary material for: Flavin-Dependent Monooxygenases as a Detoxification Mechanism in Insects: New Insights from the Arctiids (Lepidoptera)
Source: PubMed Central journal article supplement (PMC2862711; doi:10.1371/journal.pone.0010435), 2010-05-03
Supplement: pone.0010435.s003.pdf [file pone.0010435.s003.pdf]

|       |                                         |                                                                                                                                                                                                                                     |
|-------|-----------------------------------------|-------------------------------------------------------------------------------------------------------------------------------------------------------------------------------------------------------------------------------------|
| AvPNO | <i>Arctia villica</i><br>putative PNO   | <u>internal fragment</u> of ca. 600 bp<br>- nested PCR<br>→ 1. PCR: annealing: touch-down 60 → 45 °C<br>primer pair P12/P1<br>→ 2. PCR: annealing: touch-down 60 → 45 °C<br>primer pair P12/P17<br><u>5'-RACE</u> : primers P22-P24 |
| DsFMO | <i>Diacrisia sannio</i><br>putative FMO | <u>internal fragment</u> of ca. 800 bp<br>- PCR: annealing: touch-down 60 → 45 °C<br>primer pair P12/P3<br><u>3'-RACE</u> primer pair P25/P1                                                                                        |
| DsPNO | <i>Diacrisia sannio</i><br>putative PNO | <u>internal fragment</u> of ca. 480 bp<br>- PCR: annealing: 57 °C<br>primer pair P12/P17<br><u>3'-RACE</u> primer pair P26/P1                                                                                                       |
| EaFMO | <i>Estigmene acrea</i><br>putative FMO  | <u>internal fragment</u> of ca. 780 bp<br>- PCR: annealing: touch-down 65 → 50 °C<br>primer pair P12/P3<br><u>3'-RACE</u> primer pair P27/P1                                                                                        |
| EaPNO | <i>Estigmene acrea</i><br>putative PNO  | <u>internal fragment</u> of ca. 580 bp<br>- PCR: annealing: touch-down 65 → 50 °C<br>primer pair P12/P17<br><u>3'-RACE</u> primer pair P28/P1                                                                                       |
