# Supplementary material for: Flavin-Dependent Monooxygenases as a Detoxification Mechanism in Insects: New Insights from the Arctiids (Lepidoptera)
Source: PubMed Central journal article supplement (PMC2862711; doi:10.1371/journal.pone.0010435), 2010-05-03
Supplement: pone.0010435.s004.pdf [file pone.0010435.s004.pdf]

| Sequence name |                                | Accession number   |
|---------------|--------------------------------|--------------------|
| AcFMO         | <i>Arctia caja</i>             | FN649426           |
| AcPNO         | <i>Arctia caja</i>             | FN649422           |
| AvFMO         | <i>Arctia villica</i>          | FN649427           |
| BaFMO1        | <i>Bicyclus anynana</i>        | GE660293           |
| BmFMO1        | <i>Bombyx mori</i>             | GU564654           |
| BmFMO2        | <i>Bombyx mori</i>             | GU564656           |
| BmFMO3        | <i>Bombyx mori</i>             | GU564657           |
| DmFMO3006     | <i>Drosophila melanogaster</i> | NP_611859          |
| DmFMO3174     | <i>Drosophila melanogaster</i> | NP_610217          |
| DsFMO         | <i>Diacrisia sannio</i>        | FN649428           |
| DsPNO         | <i>Diacrisia sannio</i>        | FN649423           |
| EaFMO         | <i>Estigmene acrea</i>         | FN649430           |
| EaPNO         | <i>Estigmene acrea</i>         | FN649425           |
| GgSNO         | <i>Grammia geneura</i>         | FN649424           |
| HaFMO1        | <i>Helicoverpa armigera</i>    | GU564659           |
| HaFMO2        | <i>Helicoverpa armigera</i>    | GU564660           |
| HaFMO3        | <i>Helicoverpa armigera</i>    | GU564662           |
| PiFMO3        | <i>Plodia interpunctella</i>   | EB827095, EB823265 |
| TjFMO         | <i>Tyria jacobaeae</i>         | FN649429           |
| TjSNO         | <i>Tyria jacobaeae</i>         | AJ420233           |
